# Supplementary material
Source: PubMed Central journal article supplement (PMC2584690)
Supplement: 0802572105_0802572105SI.pdf [file 0802572105_0802572105SI.pdf]

# Supporting Information

Malawista *et al.* 10.1073/pnas.0802572105

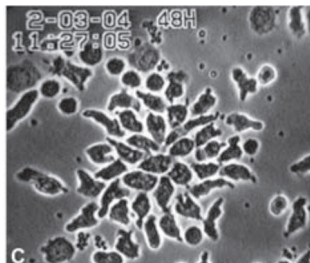

**Movie S1.** Video sequences from the experiment described in the legend to text Fig. 3: control (Fig. 3C). The selected time of maximum aggregation is 11 h, 27 min, 5 sec. On our screen (magnification  $\approx 1,250\times$ ), the mean diameter at this times is 7.25 cm. The percent difference will be constant at any projected magnification.

[Movie S1 \(MOV\)](#)

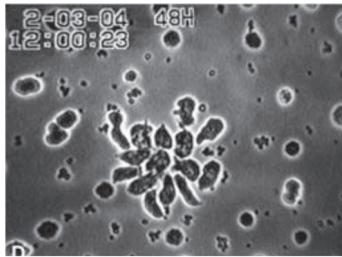

**Movie S2.** Video sequences from the experiment described in the legend to text Fig. 3: oleic acid (Fig. 3D). The selected time of maximum aggregation is 12 h, 0 min, 23 sec. On our screen (magnification  $\approx 1,250\times$ ), the mean diameter at this times is 5 cm (minus 31%). The percent difference will be constant at any projected magnification.

[Movie S2 \(MOV\)](#)

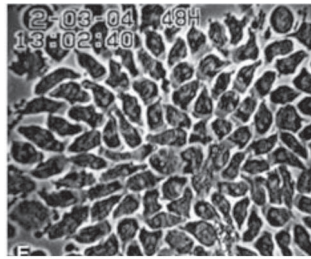

**Movie S3.** Video sequences from the experiment described in the legend to text Fig. 3: arachidonic acid (Fig. 3E). The selected time of maximum aggregation is 13 h, 2 min, 40 sec. On our screen (magnification  $\approx 1,250\times$ ), the mean diameter at this times is 15  $\mu\text{m}$  (plus 300%). The percent difference will be constant at any projected magnification.

[Movie S3 \(MOV\)](#)
